# Supplementary material
Source: HighWire-hosted journal article supplement (https://rmdopen.bmj.com/content/8/2/e002507)

### Temporal evolution of diagnostic tests in the diagnosis of GCA

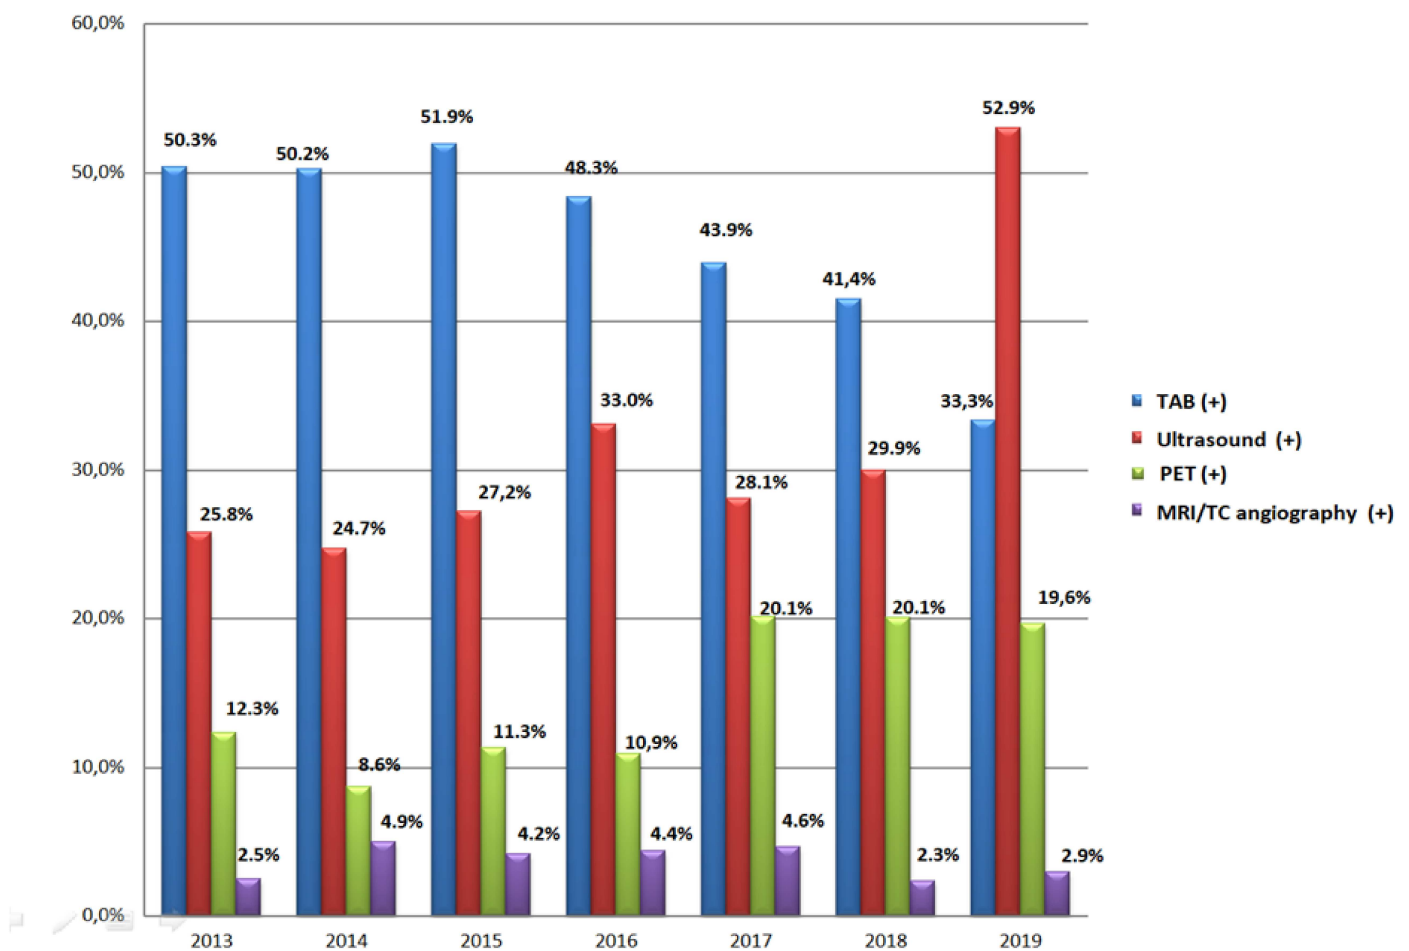

Supplement: inline-supplementary-material-3 [file inline-supplementary-material-3.pdf]
